# Supplementary material for: Additional COVID-19 Booster Vaccine Hesitancy Among Healthcare Workers in a Private Teaching Hospital in Hong Kong
Source: Research Square preprint supplement (doi:10.21203/rs.3.rs-6464444/v1), 2025-05-19
Supplement: Supplementary file 1 [file 48caf8fc88fbed49834bb5e5.docx]

Appendix A

Consent Form and Questionnaire

Introduction:
This questionnaire aims to assess the attitudes of healthcare workers in Hong Kong towards receiving an additional COVID-19 booster vaccine. Your participation in this research is greatly appreciated. The information collected through this questionnaire will be used solely for research purposes and will be treated with strict confidentiality to protect your privacy. This is an observational cross-sectional study that involves completing a questionnaire. There is no physical harm expected from participating in this study.

Voluntary Participation:
Your participation in this study is entirely voluntary, and you have the right to withdraw at any time. Choosing not to participate will not result in any discrimination or identification.

Estimated Time:
The average time to complete this questionnaire is approximately 5 minutes. Thank you for agreeing to participate in this survey.

Demographic Data Collection:
Please provide the following demographic information:

1. Age:
2. Sex:
3. Occupation:
   - Physician/Dentist
   - Pharmacist
   - Nurse
   - Lab technician
   - Administrative staff
   - Others (please specify)
4. Marital Status:
   - Single
   - Married
   - Divorced
5. Living Status:
   - Living alone
   - Living with family
6. Education Level:
   - Undergraduate
   - Postgraduate
   - Others (please specify)
7. Years of Experience as a Healthcare Worker:
   - Less than 5 years
   - 6-10 years
   - 11-15 years
   - 16-20 years
   - 21 years or above
8. Have you been certified as being contra-indicated to receive the COVID vaccine?
   - Yes
   - No
9. Chronic Illness:
   - Do you have any chronic illnesses? (You can select multiple options)
     - Diabetes
     - Hyperlipidemia
     - Renal impairment
     - Gout
     - Ischemic heart disease
     - Autoimmune disease
     - Asthma
     - Arrhythmia
     - Others (please specify)
10. COVID Diagnosis:
    - Have you been diagnosed with COVID-19 in the past?
      - Yes
      - No
      - If yes, how many previous COVID infections have you had?
11. Intent to Receive COVID Booster Vaccine:
    - Are you planning to receive another COVID booster vaccine in the near future or have you already received one in the past 6 months?
      - Yes
      - No
12. Answer Q.12 if click yes on Q.11. Skip Q.12 if Answer no on Q.11
    - Which type of COVID booster are you planning to receive?
      - mRNA vaccine (monovalent Omicron XBB.1.5 vaccine)
      - mRNA vaccine (Bivalent vaccine)
      - mRNA vaccine (Ancestral strain vaccine)
      - Inactivated vaccine
13. COVID Vaccination History:
    - Have you received any COVID vaccines?
      - Yes
      - No
      - If yes, please provide the following information:
        - Number of previous COVID injections:
        - Date of last vaccination (Year/Month)
14. Flu Vaccination:
    - Are you planning to receive the flu vaccine for the 2023-2024 season or have you already received it?
      - Yes
      - No
15. Flu Vaccination History:
    - Have you received any flu vaccines in the past?
      - Yes
      - No

| ***Item*** | *Strongly Disagree* | *Disagree* | *Somewhat Disagree* | *Neutral* | *Somewhat Agree* | *Agree* | *Strongly Agree* |
| --- | --- | --- | --- | --- | --- | --- | --- |
| I am completely confident that the COVID-19 vaccines are safe. |  |  |  |  |  |  |  |
| COVID-19 vaccines are effective. |  |  |  |  |  |  |  |
| Regarding COVID-19 vaccines, I am confident that our public authorities decide in the best interest of the community. |  |  |  |  |  |  |  |
| COVID-19 vaccination is unnecessary because COVID-19 is not common anymore. |  |  |  |  |  |  |  |
| My immune system is strong; it can protect me against COVID-19. |  |  |  |  |  |  |  |
| COVID-19 is not so severe that I should be vaccinated. |  |  |  |  |  |  |  |
| Everyday stress prevents me from being vaccinated against COVID-19. |  |  |  |  |  |  |  |
| For me, it is inconvenient to be vaccinated against COVID-19. |  |  |  |  |  |  |  |
| Visiting a healthcare facility makes me feel uncomfortable; this keeps me from being vaccinated against COVID-19. |  |  |  |  |  |  |  |
| When I think about being vaccinated against COVID-19, I weigh its benefits and risks to make the best decision possible. |  |  |  |  |  |  |  |
| For each and every vaccination, I closely consider whether it is useful for me. |  |  |  |  |  |  |  |
| It is important for me to fully understand the COVID-19 vaccine before I get vaccinated. |  |  |  |  |  |  |  |
| When everyone else is vaccinated against COVID-19, I don’t have to be vaccinated too. |  |  |  |  |  |  |  |
| I get vaccinated against COVID-19 because I can also protect people with a weaker immune system. |  |  |  |  |  |  |  |
| Vaccination is a collective action to prevent the spread of COVID- 19. |  |  |  |  |  |  |  |

Thank you for taking the time to complete this questionnaire. Your input is valuable to our research.
